# Supplementary material for: A new method for estimating carbon dioxide emissions from drained peatland forest soils for the greenhouse gas inventory of Finland
Source: Copernicus journal article supplement (doi:10.5194/bg-20-3827-2023), 2023-09-21
Supplement: Supplementary file 1 [file bg-20-3827-2023-supplement.pdf]

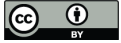

*Supplement of*

## **A new method for estimating carbon dioxide emissions from drained peatland forest soils for the greenhouse gas inventory of Finland**

**Jukka Alm et al.**

*Correspondence to:* Jukka Alm ([jukka.alm@luke.fi](mailto:jukka.alm@luke.fi)) and Juha Mikola ([juha.mikola@luke.fi](mailto:juha.mikola@luke.fi))

The copyright of individual parts of the supplement might differ from the article licence.

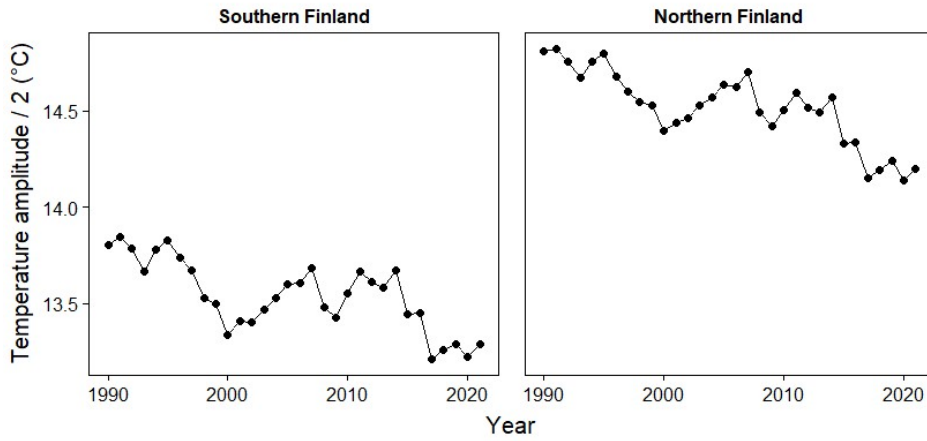

5 **Figure S1. Mean temperature amplitude (the difference between the mean temperature of the warmest and coldest month divided by two) of drained peatland forests in southern and northern Finland for 1990–2021, used in Yasso07 calculations. The means are 30-year rolling means.**

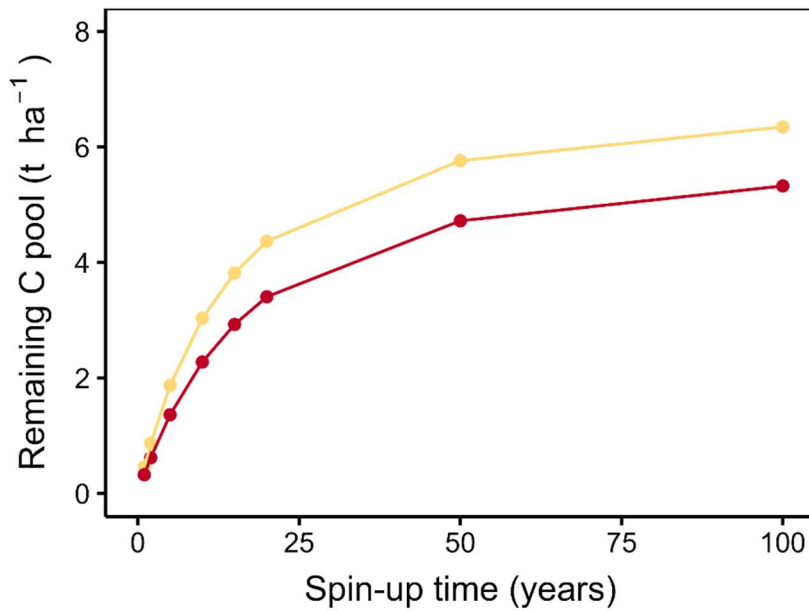

10 **Figure S2. The effect of spin-up time on the soil C pool originating from the litter of harvested and naturally died trees for southern (yellow) and northern (red) Finland. During the spin-up every year a new similar litter input from of harvesting residues and dead trees was added and consumed by the yasso07 decomposition model. The effect of number of spin-up year (Spin-up time) on remaining C pool levelled off after 50 years of yasso07 runs.**
